# Supplementary material for: Influence of 2-(diisopropylamino)ethyl methacrylate on acid-triggered hydrolysis of cyclic benzylidene acetals and their importance in efficient drug delivery
Source: Royal Society of Chemistry journal article supplement (doi:10.1039/c5py00734h), 2015-01-01
Supplement: c5py00734h1.pdf [file c5py00734h1.pdf]

Supplementary Information

**Influences of 2-(Diisopropylamino) Ethyl Methacrylate on Acid-Triggered Hydrolysis of Cyclic Benzylidene Acetals and Their Importance to Efficient of Drug Delivery**

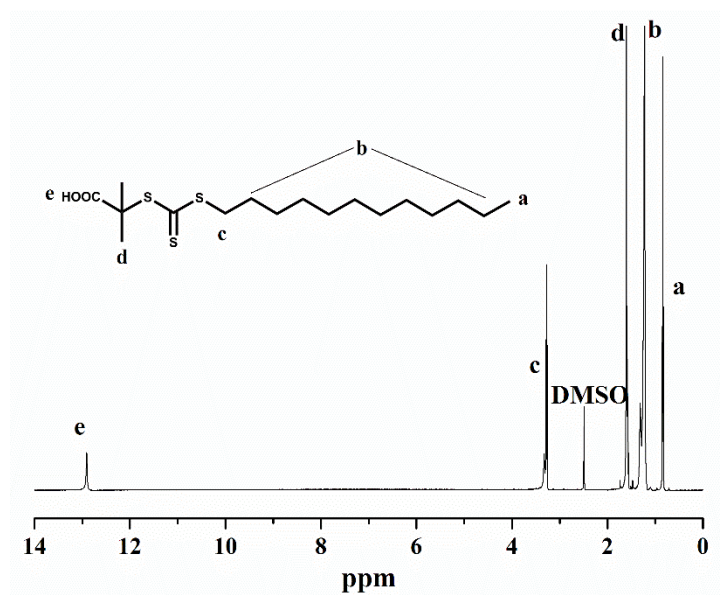

Fig.S1 <sup>1</sup>H NMR spectrum of DTM.

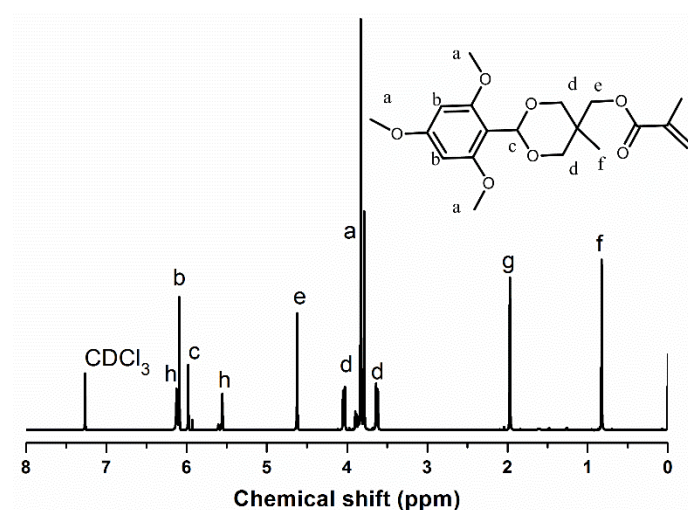

Fig. S2 <sup>1</sup>H NMR spectrum of TTMA.

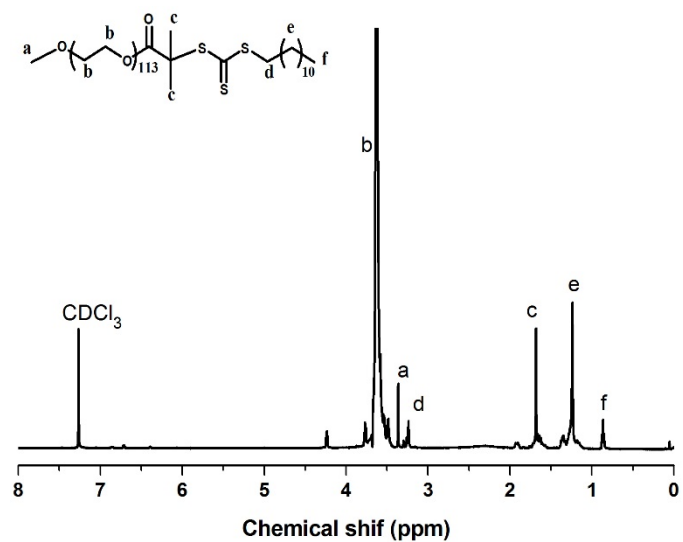

Fig. S3 <sup>1</sup>H NMR spectrum of mPEG<sub>113</sub>-DTM

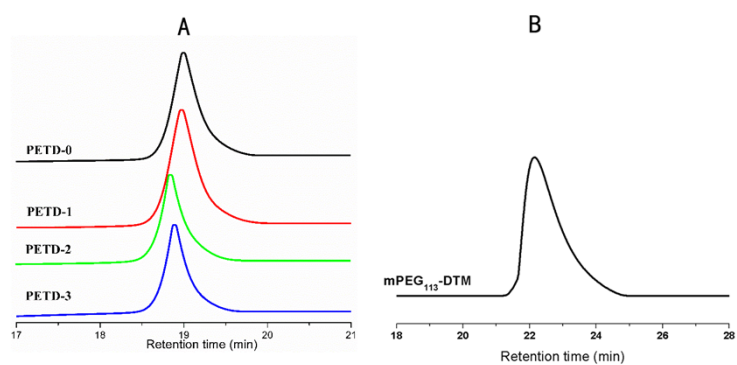

Fig. S4 GPC elution chromatograms of block copolymers PETD (A) and macroinitiator (B).

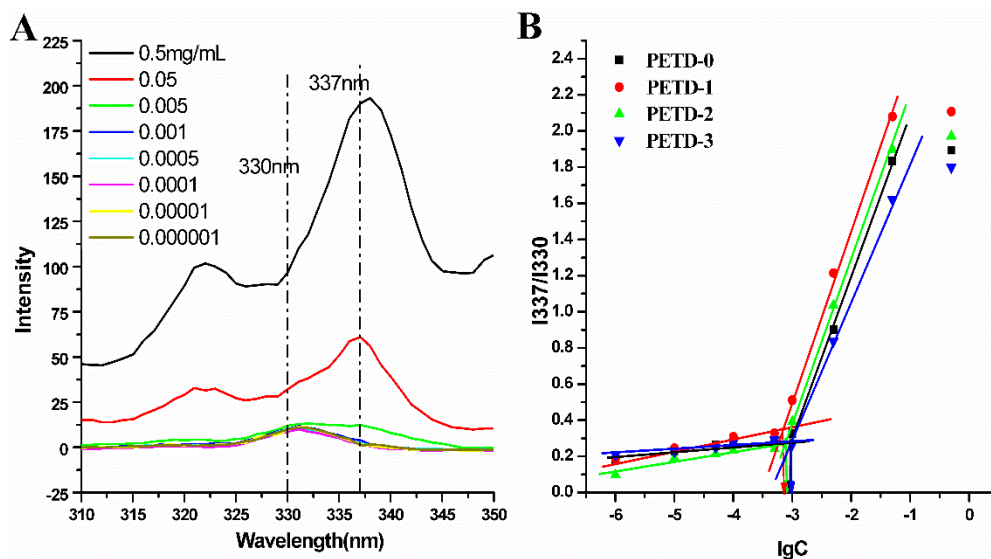

Fig. S5 (A) Emission spectrum for aqueous solutions of PETD-3 containing pyrene. (B) Plot of  $I_{337}/I_{330}$  in the excitation spectrum versus the concentrations of copolymers in aqueous solution.

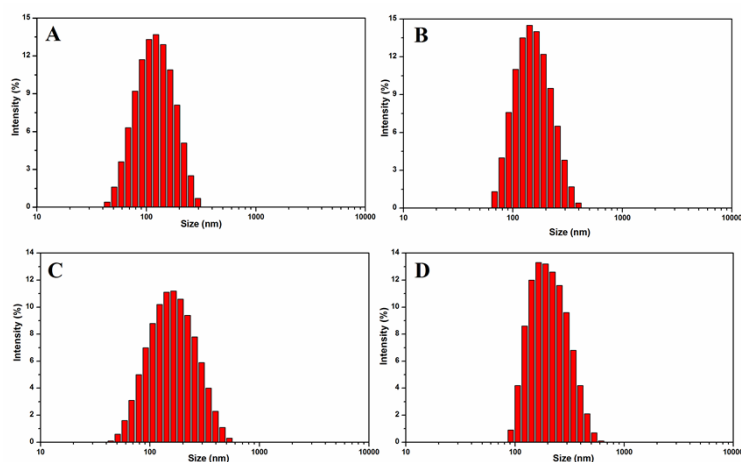

Fig. S6 Size distributions of PETD-0 (A), PETD-1 (B), PETD-2 (C) and PETD-3 (D) copolymer micelles determined by DLS at pH 7.4.

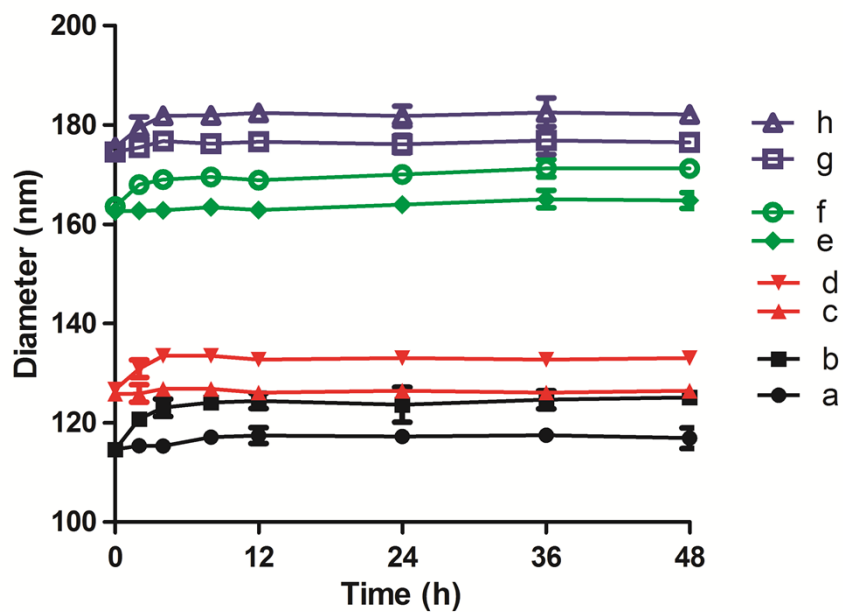

Fig. S7 Time-dependent diameters of the micelles of PETD-0 (a, b), PETD-1 (c, d), PETD-2 (e, f) and PETD-3 (g, h) in PBS 7.4 without (a, c, e, g) or with 10% FBS (b, d, f, h) as measured by DLS.

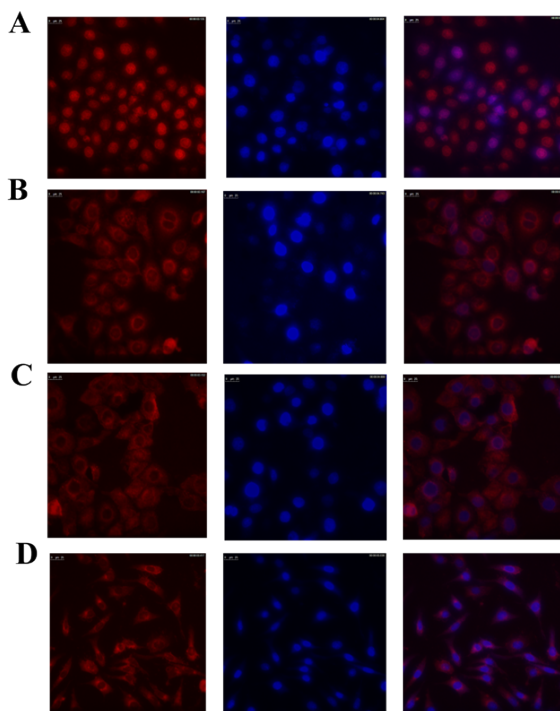

Fig. S8 Fluorescence microscopy images of HepG-2 cells following 2h incubation with DOX-loaded micelles and free DOX (30µg/mL). (A) Free DOX, (B) DOX-loaded PETD-0 micelles, (C) DOX-loaded PETD-1 micelles and (D) DOX-loaded PETD-3 micelles. For each panel, the images from left to right showed DOX fluorescence in cells (red), cell nuclei stained by DAPI (blue), and overlays of both images.

---

Table. S1 Characterization of mPEG-P (TTMA-co-DPA) Micelles.

| Sample | Size (nm) <sup>a</sup> | PDI <sup>a</sup> | CMC(mg/L) <sup>b</sup> |
|--------|------------------------|------------------|------------------------|
| PETD-0 | 134.6 ± 2.8            | 0.22 ± 0.01      | 0.97                   |
| PETD-1 | 156.1 ± 3.4            | 0.16 ± 0.03      | 0.71                   |
| PETD-2 | 169.9 ± 5.9            | 0.11 ± 0.07      | 0.83                   |
| PETD-3 | 188.4 ± 3.2            | 0.13 ± 0.08      | 0.89                   |

<sup>a</sup>Determined by DLS. <sup>b</sup>Measured by pyrene-based fluorescent spectrometry.
